# Supplementary material for: Surfactant-assisted hydrothermal synthesis of rGO/SnIn4S8 nanosheets and their application in complete removal of Cr(vi)
Source: Royal Society of Chemistry journal article supplement (doi:10.1039/c7ra12863k), 2018-01-01
Supplement: c7ra12863k1.pdf [file c7ra12863k1.pdf]

## Supporting Information.

### Surfactant-assisted hydrothermal synthesis of rGO/SnIn<sub>4</sub>S<sub>8</sub> nanosheets and its application in complete removal of Cr(VI)

P. F. Xu,<sup>a</sup> S. Y. Huang,<sup>b</sup> Y. C. Lv,<sup>b</sup> Y. C.,<sup>a,c</sup> M. H. Liu,<sup>\*b</sup> and H. J. Fan<sup>\*a,c</sup>

<sup>a</sup> National Engineering Laboratory for Clean Technology of Leather Manufacture, Sichuan University, Chengdu 610065, China.

<sup>b</sup> College of Environment & Resource, Fuzhou University, Fuzhou 350116, P. R. China.

<sup>c</sup> Light industry, textile and Food Institution, Sichuan University, Chengdu 610065, China.

\*Corresponding authors. E-mail: fanhaojun@scu.edu.cn(H. J. Fan), [mhliu2000@fzu.edu.cn](mailto:mhliu2000@fzu.edu.cn) (M. H.

Liu)

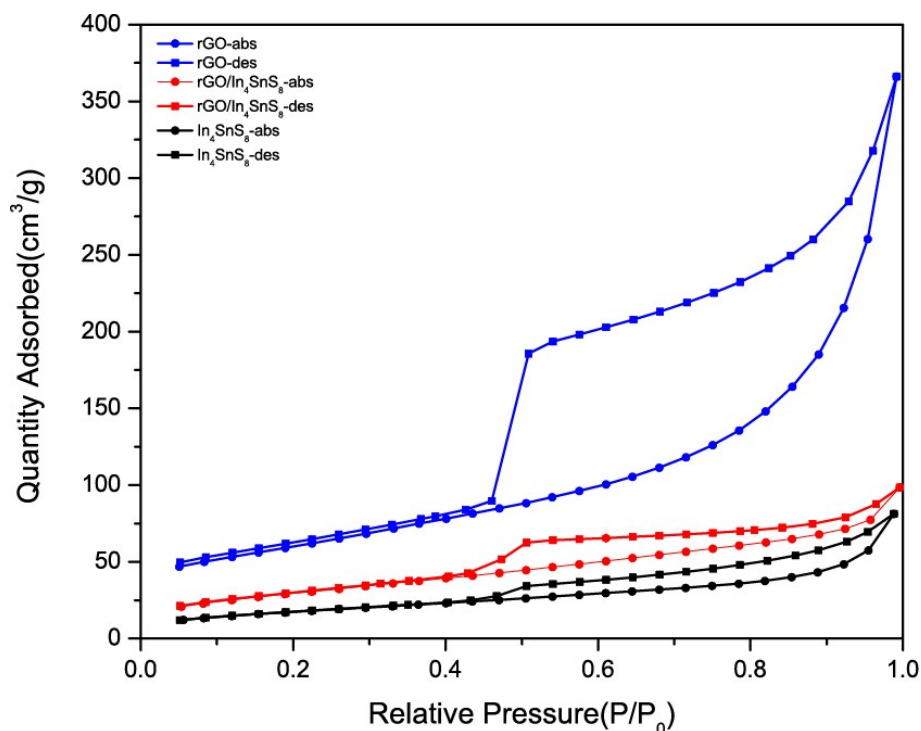

Fig. S1. Nitrogen adsorption-desorption isotherm of rGO, In<sub>4</sub>SnS<sub>8</sub> and rGO/SnIn<sub>4</sub>S<sub>8</sub>.

**Table S1** Comparison of photocatalytic activity between rGO/SnIn<sub>4</sub>S<sub>8</sub> and other reported photocatalysts under visible light irradiation

| Sample                               | Cr(VI)<br>Concentration<br>(mg/L) | Catalyst<br>Concentration<br>(g/L) | Irradiation<br>time<br>(min) | Resul<br>t<br>(%) | Reference |
|--------------------------------------|-----------------------------------|------------------------------------|------------------------------|-------------------|-----------|
| TiO <sub>2</sub> (P25)               | 10                                | 0.67                               | 180                          | 50                | 1         |
| TiO <sub>2</sub> (pure)              | 10                                | 0.67                               | 180                          | 30                | 2         |
| TiO <sub>2</sub> /rGO                | 10                                | 0.67                               | 180                          | 98                |           |
| CuO/ZrO <sub>2</sub> -<br>MCM-41     | 20                                | 1                                  | 30                           | 99                | 3         |
| CdS                                  | 10                                | 1                                  | 250                          | 79                | 4         |
| CdS/rGO                              | 10                                | 1                                  | 250                          | 92                |           |
| SnS <sub>2</sub>                     | 50                                | 1                                  | 150                          | 36                | 5         |
| SnS <sub>2</sub> /rGO                | 50                                | 1                                  | 150                          | 90                |           |
| SnIn <sub>4</sub> S <sub>8</sub>     | 50                                | 0.2                                | 60                           | 89                | Present   |
| rGO/SnIn <sub>4</sub> S <sub>8</sub> | 50                                | 0.2                                | 30                           | 99                | work      |

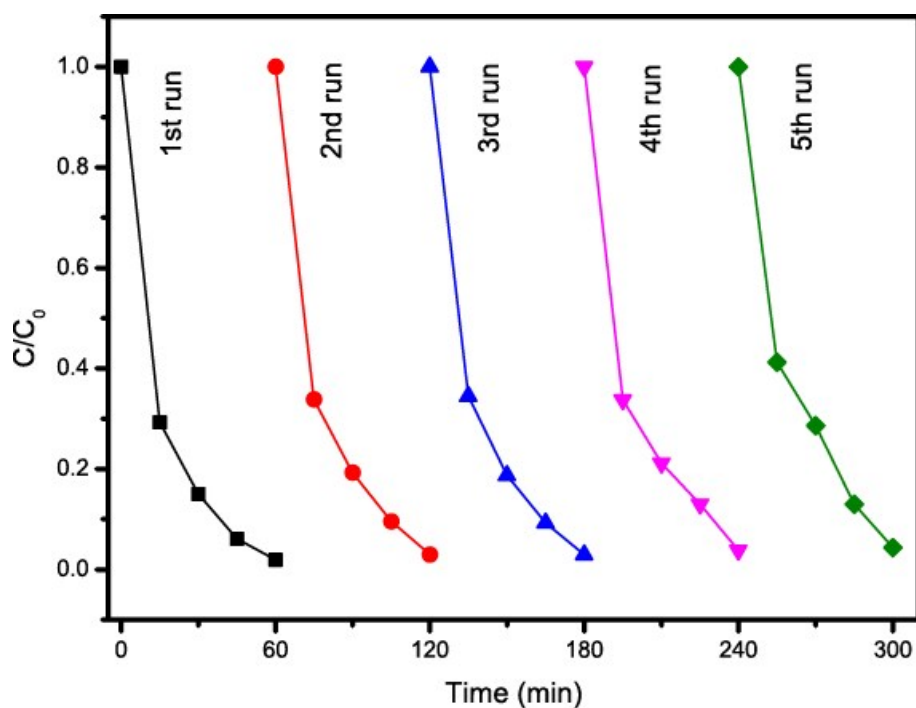

**Fig. S2** Recycled photocatalytic reduction of Cr(VI) over the rGO/SnIn<sub>4</sub>S<sub>8</sub>. Experimental conditions: 50mg/L initial Cr(VI) concentration, 0.5mM citric acid, 0.1g/L catalyst, pH 2, N<sub>2</sub> purging.

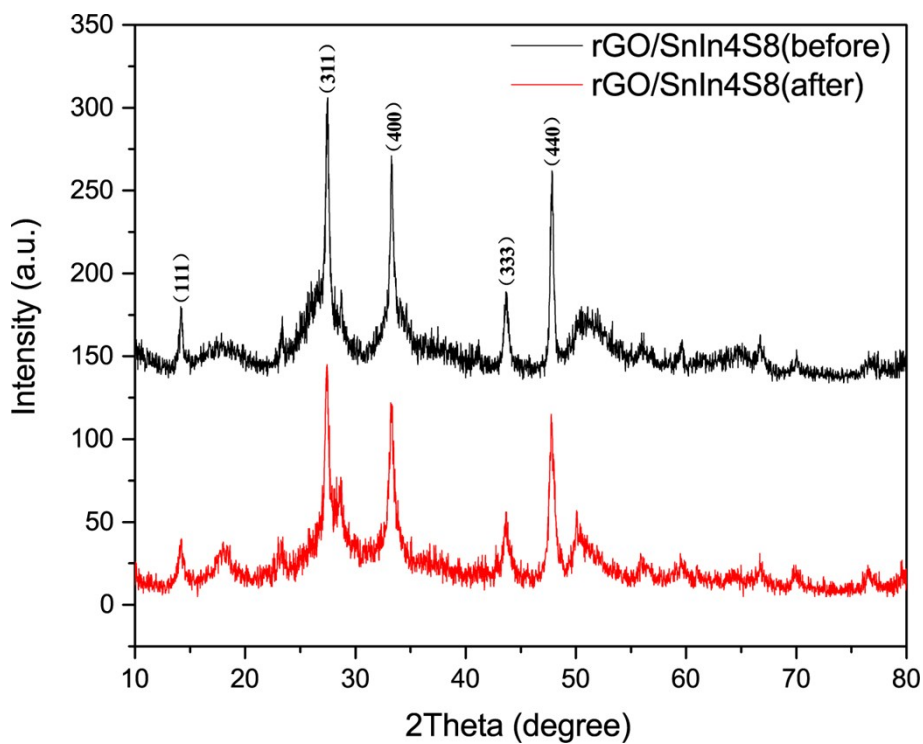

**Fig. S3** The XRD analysis of rGO/SnIn<sub>4</sub>S<sub>8</sub> before and after 5 times photocatalytic reaction.

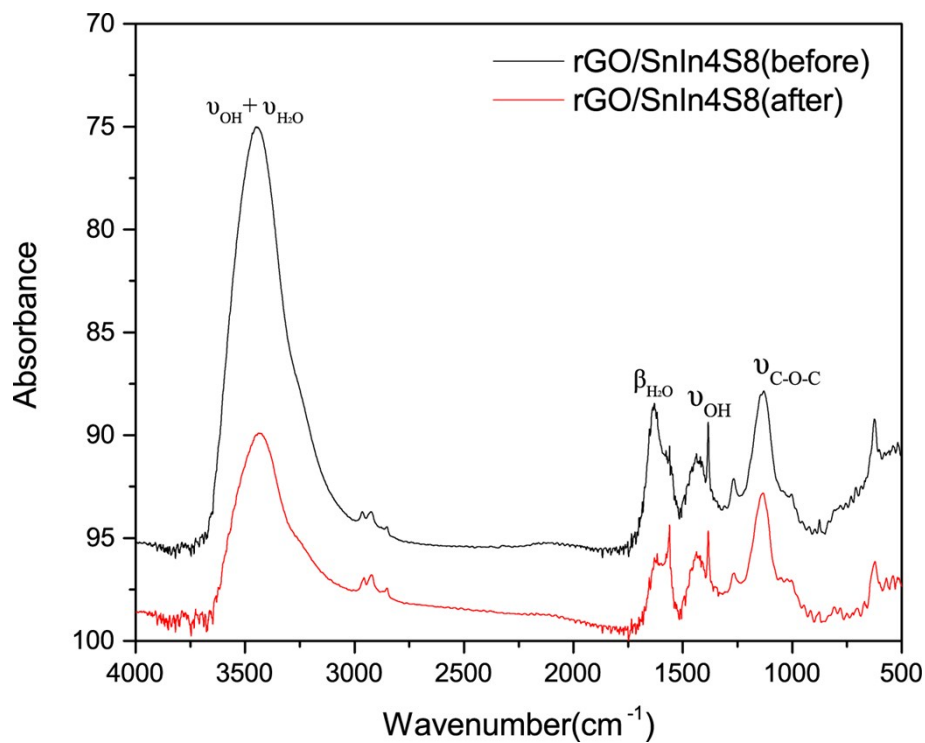

**Fig. S4** The FTIR Spectra of rGO/SnIn<sub>4</sub>S<sub>8</sub> before and after 5 times photocatalytic reaction.

## References

- 1 L. Wang, X. Li, W. Teng, Q. Zhao, Y. Shi, R. Yue and Y. Chen, *J. Hazard. Mater.*, 2013, **244-245**, 681-688.
- 2 L. Liu, C. Luo, J. Xiong, Z. Yang, Y. Zhang, Y. Cai and H. Gu, *J. Alloy. Compd.*, 2017, **690**, 771-776.
- 3 B. Nanda, A. C. Pradhan and K. M. Parida, *Chem. Eng. J.*, 2017, **316**, 1122-1135.
- 4 X. Liu, L. Pan, T. Lv, G. Zhu and Z. Sun, *Chem. Commun.*, 2011, **47**, 11984-11986.
- 5 H. Liu, L. Deng, Z. Zhang, J. Guan, Y. Yang and Z. Zhu, *J. Mater. Sci.*, 2015, **50**, 3207-3211.
